# Supplementary material for: A 1,000-Year-Old Antimicrobial Remedy with Antistaphylococcal Activity
Source: PubMed Central journal article supplement — mBio. 2015 Aug 11;6(4):e01129-15. doi: 10.1128/mBio.01129-15 (PMC4542191; doi:10.1128/mbio.01129-15), 2015-08-11
Supplement: mbo004152417sd1.pdf [file mbo004152417sd1.pdf]

## Data S1: bacteria cultured from recipes and ingredient preparations

After the nine days' incubation and filtering, a 100 µl aliquot was taken from each complete recipe, each preparation of an individual ingredient and each recipe with one ingredient omitted. This was spread onto an LB agar plate and incubated at 37°C for 48 hours. We did not observe any growth of microbial colonies on plates spread with the complete recipes (batches A-C). For batches A and B, plates spread with aliquots of onion, garlic or wine were similarly clear after 48 hours' incubation, but bacterial colonies grew on plates spread with aliquots of the leek (both batches) and the oxgall (batch only). Consistent with this, when we treated sterile synthetic wounds with complete recipes or individual ingredients and incubated them for 24 hours at 37°C, we retrieved viable cells from only the leek and oxgall treatments ( $10^5 - 10^6$  cells). For batch C, colonies were observed only on plates spread with ES-O minus garlic. A summary of growth (+) vs. no growth (-) data is presented below.

| Batch A,B           |         | Batch |   | Batch C      |              |      |   |
|---------------------|---------|-------|---|--------------|--------------|------|---|
|                     |         | A     | B |              |              |      |   |
| Recipe / ingredient | ES-O    | -     | - | Modification | Recipe base  |      |   |
|                     | ES-L    | -     | - |              | ES-O         | ES-L |   |
|                     | Control | -     | - |              | Full         | -    | - |
|                     | Garlic  | -     | - |              | - Onion/Leek | -    | - |
|                     | Wine    | -     | - |              | - Garlic     | +    | - |
|                     | Onion   | -     | - |              | - Wine       | -    | - |
|                     | Leek    | +     | + |              | - Oxgall     | -    | - |
|                     | Oxgall  | +     | - |              | - Brass      | -    | - |

Exemplar colonies of distinct colony morphotypes were selected for 16S rRNA sequencing via colony PCR and sequences identified using NCBI BLAST against microbial genomes. Primers used were 5'-GGCTGGATCACCTCCTT & 5'-TGCCAAGGCATCCACCG. The results are summarised below and reveal the bacteria to belong to species that we would reasonably expect to be present in agricultural soil. Where hits were returned to *Staphylococcus* and *Pseudomonas* species, these were not the species/strains used in our laboratory.

| Provenance |               | N. colonies sequenced | Colony morphology |        |            | Identification                                                                                        |
|------------|---------------|-----------------------|-------------------|--------|------------|-------------------------------------------------------------------------------------------------------|
| Batch      | Preparation   |                       | Diameter          | Colour | Appearance |                                                                                                       |
| A          | Leek          | 1                     | ~3mm              | Yellow | Lenticular | <i>Kocuria rhizophila</i> (formerly <i>Micrococcus luteus</i> )                                       |
|            |               | 1                     | ~5mm              | Beige  | Lenticular | <i>Staphylococcus</i> sp.                                                                             |
|            |               | 3                     | <1mm              | White  | Pinprick   | <i>Leuconostoc mesenteroides</i>                                                                      |
| A          | Oxgall        | 1                     | ~3mm              | Yellow | Lenticular | <i>Kocuria rhizophila</i> (formerly <i>Micrococcus luteus</i> )                                       |
|            |               | 2                     | ~3mm              | Beige  | Lenticular | <i>Staphylococcus</i> sp.                                                                             |
| B          | Leek          | 3                     | ~4mm              | Yellow | Lenticular | Two <i>Pseudomonas</i> sp. (likely <i>P. fluorescens</i> or <i>P. poae</i> ), one <i>Rahnella</i> sp. |
|            |               | 1                     | ~3mm              | White  | Lenticular | <i>Leuconostoc mesenteroides</i>                                                                      |
|            |               | 3                     | <1mm              | White  | Pinprick   | <i>Pseudomonas</i> sp. (likely <i>P. fluorescens</i> , <i>P. poae</i> and/or <i>P. TKP</i> )          |
| C          | ES-O - Garlic | 2                     | ~3mm              | Beige  | Lenticular | <i>Staphylococcus</i> sp. (likely <i>S. warneri</i> or <i>S. pasteurii</i> )                          |
|            |               | 2                     | ~3mm              | Yellow | Lenticular | <i>Staphylococcus</i> sp. (likely <i>S. warneri</i> or <i>S. pasteurii</i> )                          |
|            |               | 2                     | <1mm              | White  | Pinprick   | <i>Pseudomonas</i> sp.                                                                                |
