# Supplementary material for: A 1,000-Year-Old Antimicrobial Remedy with Antistaphylococcal Activity
Source: PubMed Central journal article supplement — mBio. 2015 Aug 11;6(4):e01129-15. doi: 10.1128/mBio.01129-15 (PMC4542191; doi:10.1128/mbio.01129-15), 2015-08-11
Supplement: mbo004152417sf1.pdf [file mbo004152417sf1.pdf]

**Figure S1**

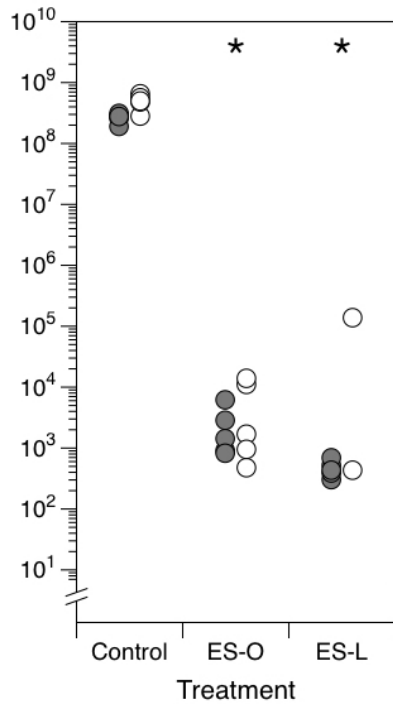

**Bald's eyesalve retains anti-Staphylococcal activity over thirty days of storage.** ES-O and ES-L (Batches A and B) retained bactericidal activity against *S. aureus* biofilms in synthetic wounds after 30 days of storage. (ANOVA: treatment  $F_{2,24} = 217, p < 0.01$ ; batch  $F_{1,24} = 0.16, p = 0.693$ ; interaction  $F_{2,24} = 0.196, p = 0.823$ ).
